# Supplementary material for: Preparation and Characterization of Polyurethane Nanocomposites Using Vietnamese Montmorillonite Modified by Polyol Surfactants
Source: Hindawi journal article supplement (doi:10.1155/2014/302735), 2014-01-01

**Preparation and characterization of polyurethane nanocomposites using Vietnamese montmorillonite modified by polyol surfactants**

C. N. Ha Thuc, H. T. Cao, D. M. Nguyen, M. A. Tran, Laurent Duclaux, A. C. Grillet, H. Ha Thuc

**Graphical abstract**


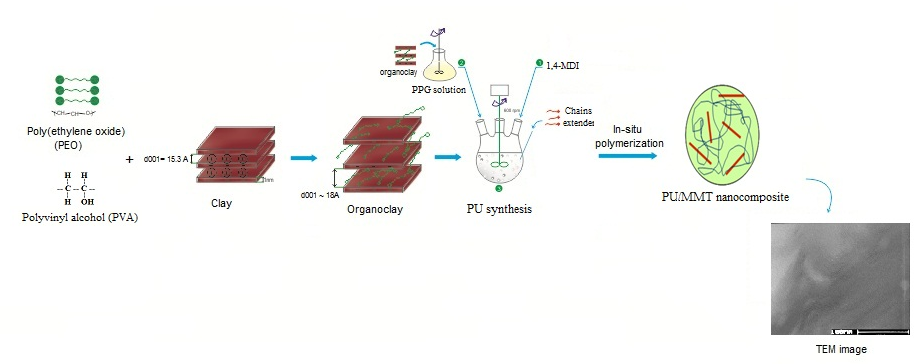

Supplement: f1 [file 302735.f1.docx]
